# Supplementary material for: Associations between greenspace and mortality vary across contexts of community change: a longitudinal ecological study
Source: PubMed Central journal article supplement — J Epidemiol Community Health. 2020 Jun 1;74(6):534–40. doi: 10.1136/jech-2019-213443 (PMC7320793; doi:10.1136/jech-2019-213443), 2020-06-01
Supplement: jech-2019-213443s001.pdf [file jech-2019-213443s001.pdf]

**SUPPLEMENTAL MATERIAL**

Associations between greenspace and mortality vary across contexts of community change: A longitudinal ecological study

Terry Hartig<sup>1</sup>, Thomas Astell-Burt<sup>2</sup>, Zara Bergsten<sup>1</sup>, Jan Amcoff<sup>3</sup>, Richard Mitchell<sup>4</sup>, Xiaoqi Feng<sup>5,2</sup>

<sup>1</sup> Institute for Housing and Urban Research, Uppsala University, Sweden; <sup>2</sup> Population Wellbeing and Environment Research Lab (PowerLab), School of Health and Society, University of Wollongong, Australia; <sup>3</sup> Department of Human and Economic Geography, Uppsala University, Sweden; <sup>4</sup> MRC/CSO Social and Public Health Sciences Unit, University of Glasgow, UK; <sup>5</sup> School of Public Health and Community Medicine, University of New South Wales, Australia.

This document contains a map showing the distribution of Swedish parishes according to their classification in terms of population density change between 2000 and 2008 (> 1 decile increase; stable; > 1 decile decrease; excluded from analyses because of change in boundaries during the period of the study). This document also contains additional information on the creation of the land use indicators used in analyses, and seven tables of supplemental results, the contents of which are described in the article.

*Distribution of Swedish Parishes According to Population Density Change 2000-2008*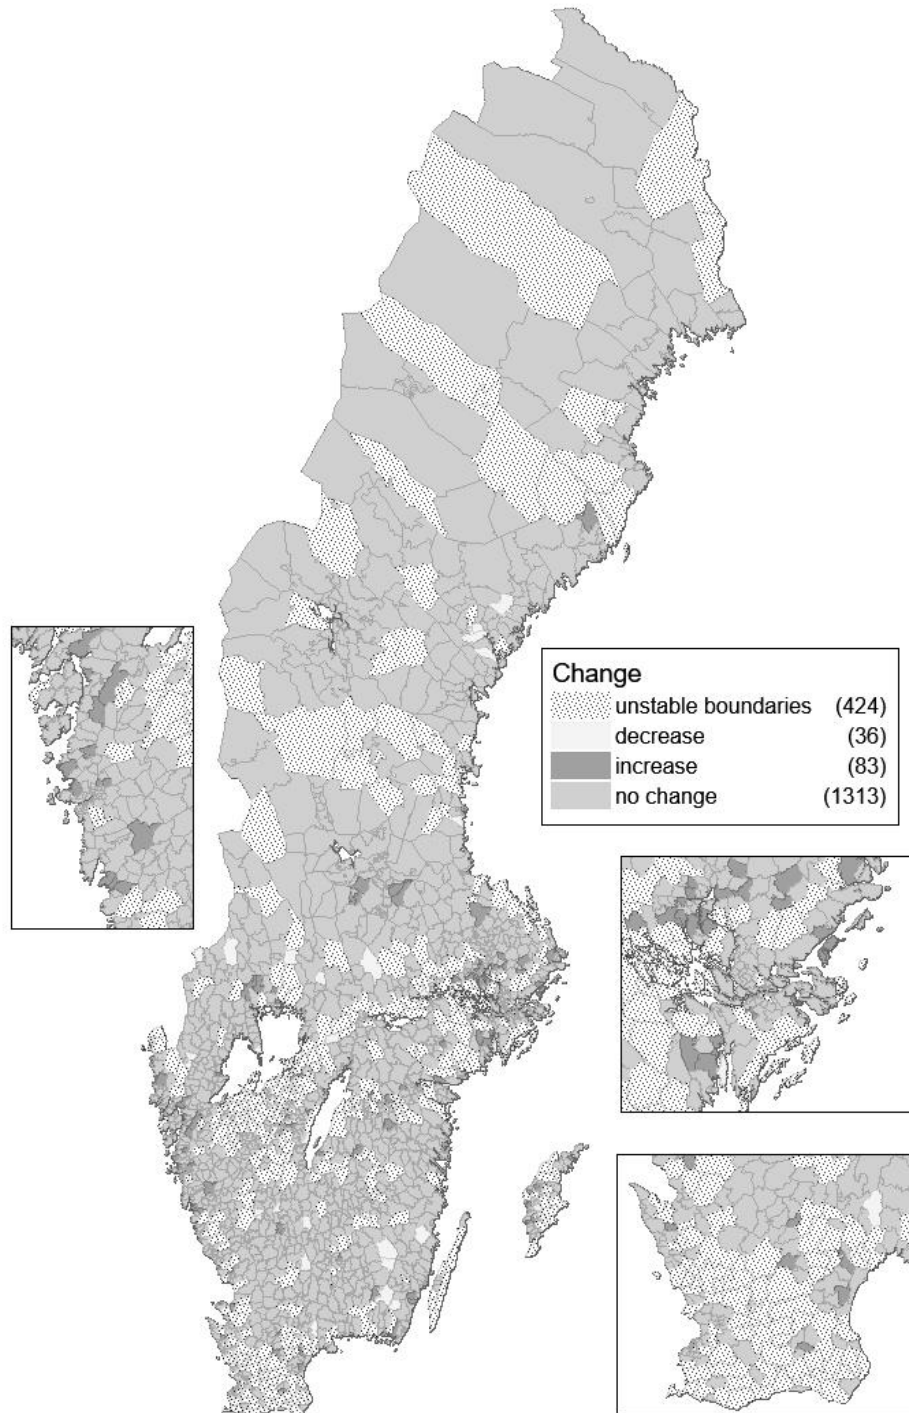

### *Creation of the Land Use Indicators*

The following text complements the text given in the main document by giving the specific land use category or categories from Lantmäteriet's typology incorporated in each of our land use classes and by giving additional examples of the kinds of land use that fall within some categories.

We created four land-use indicators, based on Lantmäteriet's typology (26; reference given in the main text): (i) dense urban structure; (ii) less dense urban structure with greenspace; (iii) urban parks; and (iv) rural greenspace (each a percentage of total parish land area). Dense urban structure comprises several categories of land use, including centrally located blocks of housing and/or commercial buildings with more than 80% of the area covered by artificially hardened surface (category 111 in Lantmäteriet's typology) as well as industrial areas and transport infrastructure (categories 121-124).

Less dense urban structure with greenspace (hereinafter "green urban") was defined through aggregation of two categories of land use: less dense urban structure with smaller areas covered by gardens and greenspace (50-80% coverage by buildings and other hardened surfaces; category 11211), and less dense urban structure with larger areas in gardens and greenspace (30-50% coverage by buildings and other hardened surfaces; category 11212).

The urban park indicator comprises areas with 70% or more of the area covered by vegetation, and the remainder covered by buildings and other artificially hardened surface (category 141). It includes parks, grass fields, graveyards, allotment garden areas, zoos, botanical gardens, and amusement parks.

The fourth land use indicator (hereinafter "rural green") comprises various land uses of a predominantly "green" character with low levels of habitation. These include development characteristic of outlying village areas (categories 1122, 1123), agricultural land (fields, orchards, pastures; categories 211, 222, 231), forests, grasslands and other areas covered by rock and vegetation of varying kinds (3111-3113, 31211, 312121, 312122, 3122, 3123, 3131, 3131, 3133, 321, 3211, 3212, 3242, 3243, 331-334), wetlands (4121-4123, 421), and facilities with large green areas, such as golf courses, playing fields and camping areas (1421-1426).

Land use not comprised by these four indicators for the most part involved different forms of open water (e.g., waterways, lakes, sea; categories 511, 5121, 5122, 521, 522, 5231, 5232). We did not include such "bluespace" in analyses because in general it has not yet been built upon to any great extent and so has not accommodated substantial population increase. Our calculation of percentage parish area in each of the four land use classes was done on the basis of land alone, excluding area in bluespace.

**Supplementary Table S1: Adjusted associations between all-cause mortality with measures of population density change and green space**

| All-Cause Mortality                                             | Model 1                                               | Model 2                      | Model 3                      | Model 4                             |
|-----------------------------------------------------------------|-------------------------------------------------------|------------------------------|------------------------------|-------------------------------------|
|                                                                 | Incident Rate Ratio (95% Confidence Interval) p-value |                              |                              |                                     |
| Population density decile 2000 to 2008                          |                                                       |                              |                              |                                     |
| Stable (reference)                                              |                                                       |                              |                              |                                     |
| ≥1 Decile Increase                                              | 0.911 (0.871, 0.953) p<0.001                          | 0.884 (0.840, 0.930) p<0.001 | 0.899 (0.855, 0.944) p<0.001 | 1.238 (0.885, 1.731) p=0.213        |
| ≥1 Decile Decrease                                              | 1.030 (0.961, 1.104) p=0.406                          | 0.990 (0.910, 1.077) p=0.816 | 0.963 (0.882, 1.050) p=0.390 | 268.157 (0.943, 76,234.630) p=0.052 |
| Green space indicators                                          |                                                       |                              |                              |                                     |
| Green urban percentage                                          | 0.998 (0.996, 1.000) p=0.036                          | 0.998 (0.996, 1.000) p=0.028 | 0.998 (0.996, 1.000) p=0.035 | 0.998 (0.996, 1.000) p=0.032        |
| Urban park percentage                                           | 1.000 (0.997, 1.002) p=0.872                          | 1.000 (0.997, 1.002) p=0.815 | 1.000 (0.997, 1.002) p=0.815 | 1.000 (0.997, 1.002) p=0.815        |
| Rural green percentage                                          | 0.997 (0.996, 0.999) p<0.001                          | 0.997 (0.996, 0.999) p<0.001 | 0.997 (0.996, 0.999) p<0.001 | 0.997 (0.996, 0.999) p<0.001        |
| Population density decile 2000 to 2008 x Green space indicators |                                                       |                              |                              |                                     |
| Stable (reference) x Green urban percentage                     |                                                       |                              |                              |                                     |
| ≥1 Decile Increase x Green urban percentage                     |                                                       | 1.008 (1.002, 1.015) p=0.014 |                              |                                     |
| ≥1 Decile Decrease x Green urban percentage                     |                                                       | 1.092 (0.977, 1.220) p=0.121 |                              |                                     |
| Stable (reference) x Urban park percentage                      |                                                       |                              |                              |                                     |
| ≥1 Decile Increase x Urban park percentage                      |                                                       |                              | 1.006 (0.996, 1.017) p=0.217 |                                     |
| ≥1 Decile Decrease x Urban park percentage                      |                                                       |                              | 1.226 (1.042, 1.442) p=0.014 |                                     |
| Stable (reference) x Rural green percentage                     |                                                       |                              |                              |                                     |
| ≥1 Decile Increase x Rural green percentage                     |                                                       |                              |                              | 0.997 (0.993, 1.000) p=0.071        |
| ≥1 Decile Decrease x Rural green percentage                     |                                                       |                              |                              | 0.945 (0.893, 1.001) p=0.054        |
| Year                                                            |                                                       |                              |                              |                                     |
| 2000 (reference)                                                |                                                       |                              |                              |                                     |
| 2001                                                            | 1.017 (1.006, 1.029) p=0.003                          | 1.018 (1.006, 1.029) p=0.003 | 1.017 (1.006, 1.029) p=0.003 | 1.017 (1.006, 1.029) p=0.003        |
| 2002                                                            | 1.039 (1.027, 1.052) p<0.001                          | 1.040 (1.027, 1.052) p<0.001 | 1.039 (1.027, 1.052) p<0.001 | 1.040 (1.027, 1.052) p<0.001        |
| 2003                                                            | 1.025 (1.012, 1.038) p<0.001                          | 1.025 (1.013, 1.038) p<0.001 | 1.025 (1.012, 1.038) p<0.001 | 1.025 (1.013, 1.038) p<0.001        |
| 2004                                                            | 0.998 (0.985, 1.011) p=0.710                          | 0.998 (0.986, 1.011) p=0.800 | 0.998 (0.985, 1.011) p=0.740 | 0.998 (0.985, 1.011) p=0.774        |
| 2005                                                            | 0.756 (0.746, 0.766) p<0.001                          | 0.756 (0.747, 0.766) p<0.001 | 0.756 (0.746, 0.766) p<0.001 | 0.756 (0.747, 0.766) p<0.001        |
| 2006                                                            | 1.017 (1.002, 1.033) p=0.027                          | 1.018 (1.003, 1.034) p=0.018 | 1.018 (1.002, 1.033) p=0.023 | 1.018 (1.003, 1.034) p=0.020        |
| 2007                                                            | 1.024 (1.007, 1.042) p=0.006                          | 1.026 (1.008, 1.044) p=0.004 | 1.025 (1.007, 1.043) p=0.005 | 1.026 (1.008, 1.043) p=0.004        |
| 2008                                                            | 1.021 (1.001, 1.040) p=0.035                          | 1.023 (1.003, 1.042) p=0.021 | 1.021 (1.002, 1.041) p=0.029 | 1.022 (1.003, 1.042) p=0.024        |
| Sex                                                             |                                                       |                              |                              |                                     |
| Male (reference)                                                |                                                       |                              |                              |                                     |
| Female                                                          | 0.867 (0.862, 0.872) p<0.001                          | 0.867 (0.862, 0.872) p<0.001 | 0.867 (0.862, 0.872) p<0.001 | 0.867 (0.862, 0.872) p<0.001        |

|                                                      |                                  |                                  |                                  |                                  |
|------------------------------------------------------|----------------------------------|----------------------------------|----------------------------------|----------------------------------|
| Age group                                            |                                  |                                  |                                  |                                  |
| 18-49 years (reference)                              |                                  |                                  |                                  |                                  |
| 50-64 years                                          | 9.677 (9.484, 9.874) p<0.001     |
| 65+ years                                            | 98.243 (96.449, 100.069) p<0.001 | 98.237 (96.444, 100.064) p<0.001 | 98.241 (96.448, 100.068) p<0.001 | 98.239 (96.446, 100.066) p<0.001 |
| Mean disposable income                               | 1.000 (1.000, 1.000) p<0.001     |
| Foreign born percentage                              | 1.000 (0.998, 1.001) p=0.677     | 0.999 (0.998, 1.001) p=0.482     | 1.000 (0.998, 1.001) p=0.510     | 1.000 (0.998, 1.001) p=0.490     |
| Higher education percentage                          | 0.997 (0.995, 0.998) p<0.001     |
| Parish population density mean                       | 1.000 (1.000, 1.000) p=0.031     | 1.000 (1.000, 1.000) p=0.023     | 1.000 (1.000, 1.000) p=0.028     | 1.000 (1.000, 1.000) p=0.025     |
| Log-likelihood                                       | -115978.07                       | -115973.80                       | -115974.19                       | -115974.51                       |
| Likelihood ratio test (p-value), compared to Model 1 |                                  | 8.55 (p=0.0139)                  | 7.78 (p=0.0205)                  | 7.12 (p=0.0284)                  |

**Supplementary Table S2: Adjusted associations between all-cause mortality with measures of population density change and green space (male)**

| All-Cause Mortality                                                    | Model 1                                               | Model 2                         | Model 3                         | Model 4                             |
|------------------------------------------------------------------------|-------------------------------------------------------|---------------------------------|---------------------------------|-------------------------------------|
|                                                                        | Incident Rate Ratio (95% Confidence Interval) p-value |                                 |                                 |                                     |
| <b>Population density decile 2000 to 2008</b>                          |                                                       |                                 |                                 |                                     |
| Stable (reference)                                                     |                                                       |                                 |                                 |                                     |
| ≥1 Decile Increase                                                     | 0.927 (0.888, 0.967) p=0.001                          | 0.895 (0.851, 0.941) p<0.001    | 0.915 (0.871, 0.961) p<0.001    | 1.201 (0.903, 1.598) p=0.208        |
| ≥1 Decile Decrease                                                     | 1.034 (0.965, 1.107) p=0.347                          | 0.999 (0.916, 1.089) p=0.976    | 0.977 (0.894, 1.068) p=0.613    | 119.278 (0.664, 21,442.420) p=0.071 |
| <b>Green space indicators</b>                                          |                                                       |                                 |                                 |                                     |
| Green urban percentage                                                 | 0.999 (0.997, 1.000) p=0.068                          | 0.999 (0.997, 1.000) p=0.054    | 0.999 (0.997, 1.000) p=0.067    | 0.999 (0.997, 1.000) p=0.062        |
| Urban park percentage                                                  | 1.000 (0.998, 1.002) p=0.942                          | 1.000 (0.998, 1.002) p=0.889    | 1.000 (0.998, 1.002) p=0.898    | 1.000 (0.998, 1.002) p=0.891        |
| Rural green percentage                                                 | 0.997 (0.996, 0.998) p<0.001                          | 0.997 (0.996, 0.998) p<0.001    | 0.997 (0.996, 0.998) p<0.001    | 0.997 (0.996, 0.998) p<0.001        |
| <b>Population density decile 2000 to 2008 x Green space indicators</b> |                                                       |                                 |                                 |                                     |
| Stable (reference) x Green urban percentage                            |                                                       |                                 |                                 |                                     |
| ≥1 Decile Increase x Green urban percentage                            |                                                       | 1.008 (1.002, 1.014) p=0.009    |                                 |                                     |
| ≥1 Decile Decrease x Green urban percentage                            |                                                       | 1.068 (0.964, 1.184) p=0.210    |                                 |                                     |
| Stable (reference) x Urban park percentage                             |                                                       |                                 |                                 |                                     |
| ≥1 Decile Increase x Urban park percentage                             |                                                       |                                 | 1.005 (0.996, 1.014) p=0.288    |                                     |
| ≥1 Decile Decrease x Urban park percentage                             |                                                       |                                 | 1.157 (0.998, 1.342) p=0.053    |                                     |
| Stable (reference) x Rural green percentage                            |                                                       |                                 |                                 |                                     |
| ≥1 Decile Increase x Rural green percentage                            |                                                       |                                 |                                 | 0.997 (0.994, 1.000) p=0.071        |
| ≥1 Decile Decrease x Rural green percentage                            |                                                       |                                 |                                 | 0.953 (0.904, 1.004) p=0.073        |
| <b>Year</b>                                                            |                                                       |                                 |                                 |                                     |
| 2000 (reference)                                                       |                                                       |                                 |                                 |                                     |
| 2001                                                                   | 1.011 (0.995, 1.028) p=0.170                          | 1.012 (0.995, 1.028) p=0.162    | 1.011 (0.995, 1.028) p=0.169    | 1.012 (0.995, 1.028) p=0.165        |
| 2002                                                                   | 1.030 (1.013, 1.047) p<0.001                          | 1.030 (1.013, 1.047) p<0.001    | 1.030 (1.013, 1.047) p<0.001    | 1.030 (1.013, 1.047) p<0.001        |
| 2003                                                                   | 1.029 (1.012, 1.046) p=0.001                          | 1.030 (1.012, 1.047) p=0.001    | 1.029 (1.012, 1.046) p=0.001    | 1.029 (1.012, 1.047) p=0.001        |
| 2004                                                                   | 0.995 (0.978, 1.012) p=0.532                          | 0.995 (0.978, 1.012) p=0.584    | 0.995 (0.978, 1.012) p=0.540    | 0.995 (0.978, 1.012) p=0.562        |
| 2005                                                                   | 0.736 (0.723, 0.748) p<0.001                          | 0.736 (0.723, 0.749) p<0.001    | 0.736 (0.723, 0.748) p<0.001    | 0.736 (0.723, 0.748) p<0.001        |
| 2006                                                                   | 1.017 (0.998, 1.036) p=0.083                          | 1.018 (0.999, 1.037) p=0.065    | 1.017 (0.998, 1.036) p=0.079    | 1.017 (0.999, 1.037) p=0.071        |
| 2007                                                                   | 1.015 (0.994, 1.035) p=0.162                          | 1.016 (0.996, 1.037) p=0.127    | 1.015 (0.994, 1.036) p=0.155    | 1.015 (0.995, 1.036) p=0.139        |
| 2008                                                                   | 1.016 (0.994, 1.038) p=0.157                          | 1.017 (0.996, 1.040) p=0.118    | 1.016 (0.994, 1.038) p=0.149    | 1.017 (0.995, 1.039) p=0.132        |
| <b>Age group</b>                                                       |                                                       |                                 |                                 |                                     |
| 18-49 years (reference)                                                |                                                       |                                 |                                 |                                     |
| 50-64 years                                                            | 10.351 (10.082, 10.627) p<0.001                       | 10.351 (10.081, 10.627) p<0.001 | 10.351 (10.082, 10.627) p<0.001 | 10.351 (10.082, 10.627) p<0.001     |
| 65+ years                                                              | 94.625 (92.356, 96.949) p<0.001                       | 94.620 (92.351, 96.945) p<0.001 | 94.624 (92.355, 96.949) p<0.001 | 94.623 (92.354, 96.948) p<0.001     |

|                                                      |                              |                              |                              |                              |
|------------------------------------------------------|------------------------------|------------------------------|------------------------------|------------------------------|
| Mean disposable income                               | 1.000 (1.000, 1.000) p<0.001 |
| Foreign born percentage                              | 0.999 (0.997, 1.000) p=0.031 | 0.998 (0.997, 1.000) p=0.013 | 0.998 (0.997, 1.000) p=0.019 | 0.998 (0.997, 1.000) p=0.015 |
| Higher education percentage                          | 0.997 (0.995, 0.998) p<0.001 |
| Parish population density mean                       | 1.000 (1.000, 1.000) p=0.010 | 1.000 (1.000, 1.000) p=0.007 | 1.000 (1.000, 1.000) p=0.009 | 1.000 (1.000, 1.000) p=0.008 |
| Log-likelihood                                       | -59445.982                   | -59441.73                    | -59443.53                    | -59442.72                    |
| Likelihood ratio test (p-value), compared to Model 1 |                              | 8.50 (p=0.0143)              | 4.91 (p=0.0857)              | 6.52 (p=0.0383)              |

---

**Supplementary Table S3: Adjusted associations between all-cause mortality with measures of population density change and green space (female)**

| All-Cause Mortality                                                    | Model 1                                               | Model 2                            | Model 3                            | Model 4                                 |
|------------------------------------------------------------------------|-------------------------------------------------------|------------------------------------|------------------------------------|-----------------------------------------|
|                                                                        | Incident Rate Ratio (95% Confidence Interval) p-value |                                    |                                    |                                         |
| <b>Population density decile 2000 to 2008</b>                          |                                                       |                                    |                                    |                                         |
| Stable (reference)                                                     |                                                       |                                    |                                    |                                         |
| ≥1 Decile Increase                                                     | 0.908 (0.859, 0.959) p=0.001                          | 0.872 (0.818, 0.929) p<0.001       | 0.888 (0.835, 0.945) p<0.001       | 1.334 (0.903, 1.971) p=0.147            |
| ≥1 Decile Decrease                                                     | 1.012 (0.928, 1.102) p=0.792                          | 0.952 (0.855, 1.059) p=0.363       | 0.918 (0.821, 1.026) p=0.131       | 1043.852 (1.089, 1,000,272.000) p=0.047 |
| <b>Green space indicators</b>                                          |                                                       |                                    |                                    |                                         |
| Green urban percentage                                                 | 0.998 (0.996, 1.000) p=0.040                          | 0.998 (0.996, 1.000) p=0.031       | 0.998 (0.996, 1.000) p=0.039       | 0.998 (0.996, 1.000) p=0.036            |
| Urban park percentage                                                  | 1.001 (0.998, 1.004) p=0.633                          | 1.001 (0.998, 1.004) p=0.684       | 1.001 (0.998, 1.004) p=0.695       | 1.001 (0.998, 1.004) p=0.689            |
| Rural green percentage                                                 | 0.998 (0.996, 0.999) p=0.001                          | 0.998 (0.996, 0.999) p=0.001       | 0.998 (0.996, 0.999) p=0.001       | 0.998 (0.996, 0.999) p=0.001            |
| <b>Population density decile 2000 to 2008 x Green space indicators</b> |                                                       |                                    |                                    |                                         |
| Stable (reference) x Green urban percentage                            |                                                       |                                    |                                    |                                         |
| ≥1 Decile Increase x Green urban percentage                            |                                                       | 1.010 (1.002, 1.018) p=0.015       |                                    |                                         |
| ≥1 Decile Decrease x Green urban percentage                            |                                                       | 1.135 (0.991, 1.299) p=0.067       |                                    |                                         |
| Stable (reference) x Urban park percentage                             |                                                       |                                    |                                    |                                         |
| ≥1 Decile Increase x Urban park percentage                             |                                                       |                                    | 1.009 (0.997, 1.021) p=0.132       |                                         |
| ≥1 Decile Decrease x Urban park percentage                             |                                                       |                                    | 1.306 (1.072, 1.592) p=0.008       |                                         |
| Stable (reference) x Rural green percentage                            |                                                       |                                    |                                    |                                         |
| ≥1 Decile Increase x Rural green percentage                            |                                                       |                                    |                                    | 0.996 (0.992, 1.000) p=0.051            |
| ≥1 Decile Decrease x Rural green percentage                            |                                                       |                                    |                                    | 0.932 (0.870, 0.999) p=0.047            |
| <b>Year</b>                                                            |                                                       |                                    |                                    |                                         |
| 2000 (reference)                                                       |                                                       |                                    |                                    |                                         |
| 2001                                                                   | 1.029 (1.013, 1.045) p<0.001                          | 1.029 (1.013, 1.046) p<0.001       | 1.029 (1.013, 1.045) p<0.001       | 1.029 (1.013, 1.046) p<0.001            |
| 2002                                                                   | 1.059 (1.042, 1.076) p<0.001                          | 1.060 (1.043, 1.077) p<0.001       | 1.059 (1.042, 1.076) p<0.001       | 1.059 (1.042, 1.077) p<0.001            |
| 2003                                                                   | 1.035 (1.018, 1.052) p<0.001                          | 1.036 (1.019, 1.053) p<0.001       | 1.035 (1.018, 1.053) p<0.001       | 1.035 (1.018, 1.053) p<0.001            |
| 2004                                                                   | 1.016 (0.999, 1.034) p=0.063                          | 1.017 (1.000, 1.035) p=0.050       | 1.017 (0.999, 1.034) p=0.058       | 1.017 (1.000, 1.035) p=0.053            |
| 2005                                                                   | 0.787 (0.774, 0.801) p<0.001                          | 0.788 (0.774, 0.801) p<0.001       | 0.787 (0.774, 0.801) p<0.001       | 0.788 (0.774, 0.801) p<0.001            |
| 2006                                                                   | 1.045 (1.024, 1.065) p<0.001                          | 1.046 (1.026, 1.067) p<0.001       | 1.045 (1.025, 1.066) p<0.001       | 1.046 (1.025, 1.067) p<0.001            |
| 2007                                                                   | 1.068 (1.045, 1.092) p<0.001                          | 1.070 (1.047, 1.094) p<0.001       | 1.069 (1.046, 1.093) p<0.001       | 1.070 (1.046, 1.094) p<0.001            |
| 2008                                                                   | 1.067 (1.042, 1.093) p<0.001                          | 1.069 (1.044, 1.095) p<0.001       | 1.068 (1.042, 1.094) p<0.001       | 1.069 (1.043, 1.095) p<0.001            |
| <b>Age group</b>                                                       |                                                       |                                    |                                    |                                         |
| 18-49 years (reference)                                                |                                                       |                                    |                                    |                                         |
| 50-64 years                                                            | 8.901 (8.635, 9.176) p<0.001                          | 8.901 (8.634, 9.176) p<0.001       | 8.901 (8.635, 9.176) p<0.001       | 8.901 (8.635, 9.176) p<0.001            |
| 65+ years                                                              | 103.129 (100.323, 106.013) p<0.001                    | 103.121 (100.315, 106.006) p<0.001 | 103.128 (100.322, 106.012) p<0.001 | 103.124 (100.318, 106.009) p<0.001      |



|                                                      |                              |                              |                              |                              |
|------------------------------------------------------|------------------------------|------------------------------|------------------------------|------------------------------|
| Mean disposable income                               | 1.000 (1.000, 1.000) p<0.001 |
| Foreign born percentage                              | 0.998 (0.996, 1.000) p=0.012 | 0.998 (0.996, 0.999) p=0.005 | 0.998 (0.996, 0.999) p=0.006 | 0.998 (0.996, 0.999) p=0.005 |
| Higher education percentage                          | 0.997 (0.995, 0.999) p=0.001 | 0.997 (0.995, 0.999) p<0.001 | 0.997 (0.995, 0.999) p=0.001 | 0.997 (0.995, 0.999) p=0.001 |
| Parish population density mean                       | 1.000 (1.000, 1.000) p=0.004 | 1.000 (1.000, 1.000) p=0.003 | 1.000 (1.000, 1.000) p=0.003 | 1.000 (1.000, 1.000) p=0.003 |
| Log-likelihood                                       | -56349.08                    | -56344.32                    | -56344.28                    | -56345.11                    |
| Likelihood ratio test (p-value), compared to Model 1 |                              | 9.52 (p=0.0086)              | 9.59 (p=0.0083)              | 7.93 (p=0.0190)              |

**Supplementary Table S4: Adjusted associations between CVD mortality with measures of population density change and green space**

| Cardiovascular Disease Mortality                                | Model 1                                               | Model 2                      | Model 3                      | Model 4                              |
|-----------------------------------------------------------------|-------------------------------------------------------|------------------------------|------------------------------|--------------------------------------|
|                                                                 | Incident Rate Ratio (95% Confidence Interval) p-value |                              |                              |                                      |
| Population density decile 2000 to 2008                          |                                                       |                              |                              |                                      |
| Stable (reference)                                              |                                                       |                              |                              |                                      |
| ≥1 Decile Increase                                              | 0.889 (0.839, 0.941) p<0.001                          | 0.844 (0.790, 0.902) p<0.001 | 0.867 (0.813, 0.924) p<0.001 | 1.443 (0.957, 2.175) p=0.080         |
| ≥1 Decile Decrease                                              | 1.056 (0.967, 1.153) p=0.226                          | 1.001 (0.898, 1.114) p=0.993 | 0.971 (0.869, 1.086) p=0.610 | 863.851 (0.819, 910,956.600) p=0.057 |
| Green space indicators                                          |                                                       |                              |                              |                                      |
| Green urban percentage                                          | 0.998 (0.995, 1.000) p=0.021                          | 0.997 (0.995, 0.999) p=0.014 | 0.998 (0.995, 1.000) p=0.020 | 0.997 (0.995, 1.000) p=0.018         |
| Urban park percentage                                           | 1.001 (0.998, 1.004) p=0.631                          | 1.001 (0.997, 1.004) p=0.686 | 1.001 (0.997, 1.004) p=0.695 | 1.001 (0.997, 1.004) p=0.692         |
| Rural green percentage                                          | 0.998 (0.996, 0.999) p=0.006                          | 0.998 (0.996, 0.999) p=0.004 | 0.998 (0.996, 0.999) p=0.005 | 0.998 (0.996, 0.999) p=0.005         |
| Population density decile 2000 to 2008 x Green space indicators |                                                       |                              |                              |                                      |
| Stable (reference) x Green urban percentage                     |                                                       |                              |                              |                                      |
| ≥1 Decile Increase x Green urban percentage                     |                                                       | 1.013 (1.004, 1.021) p=0.003 |                              |                                      |
| ≥1 Decile Decrease x Green urban percentage                     |                                                       | 1.120 (0.976, 1.285) p=0.106 |                              |                                      |
| Stable (reference) x Urban park percentage                      |                                                       |                              |                              |                                      |
| ≥1 Decile Increase x Urban park percentage                      |                                                       |                              | 1.011 (0.998, 1.024) p=0.096 |                                      |
| ≥1 Decile Decrease x Urban park percentage                      |                                                       |                              | 1.268 (1.038, 1.549) p=0.020 |                                      |
| Stable (reference) x Rural green percentage                     |                                                       |                              |                              |                                      |
| ≥1 Decile Increase x Rural green percentage                     |                                                       |                              |                              | 0.995 (0.990, 0.999) p=0.019         |
| ≥1 Decile Decrease x Rural green percentage                     |                                                       |                              |                              | 0.934 (0.871, 1.003) p=0.059         |
| Year                                                            |                                                       |                              |                              |                                      |
| 2000 (reference)                                                |                                                       |                              |                              |                                      |
| 2001                                                            | 1.008 (0.992, 1.025) p=0.328                          | 1.009 (0.992, 1.026) p=0.304 | 1.008 (0.992, 1.025) p=0.323 | 1.009 (0.992, 1.026) p=0.313         |
| 2002                                                            | 1.021 (1.004, 1.039) p=0.018                          | 1.022 (1.004, 1.039) p=0.014 | 1.021 (1.004, 1.039) p=0.017 | 1.022 (1.004, 1.039) p=0.015         |
| 2003                                                            | 1.002 (0.984, 1.020) p=0.861                          | 1.003 (0.985, 1.021) p=0.776 | 1.002 (0.984, 1.020) p=0.835 | 1.002 (0.985, 1.020) p=0.803         |
| 2004                                                            | 0.957 (0.940, 0.975) p<0.001                          | 0.958 (0.941, 0.976) p<0.001 | 0.958 (0.940, 0.975) p<0.001 | 0.958 (0.940, 0.976) p<0.001         |
| 2005                                                            | 0.702 (0.689, 0.715) p<0.001                          | 0.703 (0.690, 0.716) p<0.001 | 0.702 (0.689, 0.715) p<0.001 | 0.703 (0.690, 0.716) p<0.001         |
| 2006                                                            | 0.969 (0.949, 0.989) p=0.003                          | 0.971 (0.950, 0.991) p=0.005 | 0.969 (0.949, 0.990) p=0.004 | 0.970 (0.950, 0.991) p=0.005         |
| 2007                                                            | 0.972 (0.949, 0.995) p=0.017                          | 0.974 (0.951, 0.997) p=0.028 | 0.972 (0.950, 0.996) p=0.020 | 0.973 (0.951, 0.996) p=0.024         |
| 2008                                                            | 0.961 (0.937, 0.986) p=0.003                          | 0.964 (0.940, 0.989) p=0.005 | 0.962 (0.938, 0.987) p=0.003 | 0.963 (0.939, 0.988) p=0.004         |
| Sex                                                             |                                                       |                              |                              |                                      |
| Male (reference)                                                |                                                       |                              |                              |                                      |
| Female                                                          | 0.854 (0.848, 0.861) p<0.001                          | 0.854 (0.848, 0.861) p<0.001 | 0.854 (0.848, 0.861) p<0.001 | 0.854 (0.848, 0.861) p<0.001         |

|                                                      |                                       |                                       |                                       |                                    |
|------------------------------------------------------|---------------------------------------|---------------------------------------|---------------------------------------|------------------------------------|
| Age group                                            |                                       |                                       |                                       |                                    |
| 18-49 years (reference)                              |                                       |                                       |                                       |                                    |
| 50-64 years                                          | 11.380 (10.933, 11.845) p<0.001       | 11.378 (10.931, 11.843) p<0.001       | 11.380 (10.932, 11.845) p<0.001       | 11.379 (10.932, 11.844) p<0.001    |
| 65+ years                                            | 191.047 (184.116, 198.240)<br>p<0.001 | 191.006 (184.076, 198.197)<br>p<0.001 | 191.041 (184.110, 198.233)<br>p<0.001 | 191.023 (184.093, 198.215) p<0.001 |
| Mean disposable income                               | 1.000 (1.000, 1.000) p<0.001          | 1.000 (1.000, 1.000) p<0.001          | 1.000 (1.000, 1.000) p<0.001          | 1.000 (1.000, 1.000) p<0.001       |
| Foreign born percentage                              | 0.998 (0.996, 0.999) p=0.010          | 0.997 (0.996, 0.999) p=0.003          | 0.997 (0.996, 0.999) p=0.004          | 0.997 (0.996, 0.999) p=0.003       |
| Higher education percentage                          | 0.995 (0.993, 0.997) p<0.001          | 0.995 (0.993, 0.997) p<0.001          | 0.995 (0.993, 0.997) p<0.001          | 0.995 (0.993, 0.997) p<0.001       |
| Parish population density mean                       | 1.000 (1.000, 1.000) p=0.009          | 1.000 (1.000, 1.000) p=0.006          | 1.000 (1.000, 1.000) p=0.008          | 1.000 (1.000, 1.000) p=0.007       |
| Log-likelihood                                       | -83046.70                             | -83040.70                             | -83042.48                             | -83042.07                          |
| Likelihood ratio test (p-value), compared to Model 1 |                                       | 11.97 (p=0.0025)                      | 8.39 (p=0.0150)                       | 9.22 (p=0.0099)                    |

**Supplementary Table S5: Adjusted associations between CVD mortality with measures of population density change and green space (male)**

| Cardiovascular Disease Mortality                                | Model 1                                               | Model 2                            | Model 3                            | Model 4                              |
|-----------------------------------------------------------------|-------------------------------------------------------|------------------------------------|------------------------------------|--------------------------------------|
|                                                                 | Incident Rate Ratio (95% Confidence Interval) p-value |                                    |                                    |                                      |
| Population density decile 2000 to 2008                          |                                                       |                                    |                                    |                                      |
| Stable (reference)                                              |                                                       |                                    |                                    |                                      |
| ≥1 Decile Increase                                              | 0.915 (0.865, 0.967) p=0.002                          | 0.851 (0.795, 0.910) p<0.001       | 0.884 (0.828, 0.943) p<0.001       | 1.554 (1.091, 2.214) p=0.015         |
| ≥1 Decile Decrease                                              | 1.079 (0.988, 1.179) p=0.091                          | 1.020 (0.912, 1.140) p=0.729       | 1.006 (0.896, 1.129) p=0.919       | 566.647 (0.899, 357,235.400) p=0.054 |
| Green space indicators                                          |                                                       |                                    |                                    |                                      |
| Green urban percentage                                          | 0.998 (0.997, 1.000) p=0.093                          | 0.998 (0.997, 1.000) p=0.065       | 0.998 (0.997, 1.000) p=0.091       | 0.998 (0.997, 1.000) p=0.080         |
| Urban park percentage                                           | 1.002 (0.999, 1.004) p=0.258                          | 1.001 (0.999, 1.004) p=0.289       | 1.001 (0.999, 1.004) p=0.299       | 1.001 (0.999, 1.004) p=0.297         |
| Rural green percentage                                          | 0.998 (0.997, 0.999) p=0.003                          | 0.998 (0.997, 0.999) p=0.002       | 0.998 (0.997, 0.999) p=0.003       | 0.998 (0.997, 0.999) p=0.003         |
| Population density decile 2000 to 2008 x Green space indicators |                                                       |                                    |                                    |                                      |
| Stable (reference) x Green urban percentage                     |                                                       |                                    |                                    |                                      |
| ≥1 Decile Increase x Green urban percentage                     |                                                       | 1.014 (1.007, 1.022) p<0.001       |                                    |                                      |
| ≥1 Decile Decrease x Green urban percentage                     |                                                       | 1.108 (0.974, 1.260) p=0.118       |                                    |                                      |
| Stable (reference) x Urban park percentage                      |                                                       |                                    |                                    |                                      |
| ≥1 Decile Increase x Urban park percentage                      |                                                       |                                    | 1.012 (1.000, 1.023) p=0.043       |                                      |
| ≥1 Decile Decrease x Urban park percentage                      |                                                       |                                    | 1.189 (0.989, 1.429) p=0.066       |                                      |
| Stable (reference) x Rural green percentage                     |                                                       |                                    |                                    |                                      |
| ≥1 Decile Increase x Rural green percentage                     |                                                       |                                    |                                    | 0.994 (0.990, 0.998) p=0.003         |
| ≥1 Decile Decrease x Rural green percentage                     |                                                       |                                    |                                    | 0.939 (0.879, 1.002) p=0.057         |
| Year                                                            |                                                       |                                    |                                    |                                      |
| 2000 (reference)                                                |                                                       |                                    |                                    |                                      |
| 2001                                                            | 1.005 (0.982, 1.028) p=0.668                          | 1.005 (0.983, 1.029) p=0.643       | 1.005 (0.982, 1.028) p=0.668       | 1.005 (0.982, 1.028) p=0.655         |
| 2002                                                            | 1.010 (0.987, 1.034) p=0.403                          | 1.011 (0.987, 1.035) p=0.368       | 1.010 (0.987, 1.034) p=0.399       | 1.010 (0.987, 1.034) p=0.383         |
| 2003                                                            | 0.998 (0.974, 1.022) p=0.844                          | 0.999 (0.975, 1.023) p=0.910       | 0.998 (0.974, 1.022) p=0.855       | 0.998 (0.975, 1.022) p=0.883         |
| 2004                                                            | 0.945 (0.922, 0.968) p<0.001                          | 0.946 (0.923, 0.969) p<0.001       | 0.945 (0.922, 0.969) p<0.001       | 0.946 (0.923, 0.969) p<0.001         |
| 2005                                                            | 0.685 (0.669, 0.702) p<0.001                          | 0.686 (0.670, 0.703) p<0.001       | 0.686 (0.669, 0.702) p<0.001       | 0.686 (0.669, 0.703) p<0.001         |
| 2006                                                            | 0.960 (0.935, 0.985) p=0.002                          | 0.961 (0.937, 0.987) p=0.003       | 0.960 (0.935, 0.985) p=0.002       | 0.961 (0.936, 0.986) p=0.003         |
| 2007                                                            | 0.960 (0.933, 0.987) p=0.004                          | 0.962 (0.936, 0.990) p=0.007       | 0.960 (0.934, 0.988) p=0.005       | 0.961 (0.935, 0.989) p=0.006         |
| 2008                                                            | 0.949 (0.921, 0.977) p<0.001                          | 0.951 (0.924, 0.980) p=0.001       | 0.949 (0.921, 0.978) p=0.001       | 0.950 (0.923, 0.979) p=0.001         |
| Age group                                                       |                                                       |                                    |                                    |                                      |
| 18-49 years (reference)                                         |                                                       |                                    |                                    |                                      |
| 50-64 years                                                     | 11.864 (11.332, 12.421) p<0.001                       | 11.862 (11.330, 12.419) p<0.001    | 11.863 (11.331, 12.420) p<0.001    | 11.863 (11.331, 12.420) p<0.001      |
| 65+ years                                                       | 142.745 (136.799, 148.951) p<0.001                    | 142.720 (136.775, 148.923) p<0.001 | 142.744 (136.798, 148.948) p<0.001 | 142.734 (136.788, 148.938) p<0.001   |

|                                                      |                              |                              |                              |                              |
|------------------------------------------------------|------------------------------|------------------------------|------------------------------|------------------------------|
| Mean disposable income                               | 1.000 (1.000, 1.000) p<0.001 |
| Foreign born percentage                              | 0.996 (0.995, 0.998) p<0.001 | 0.996 (0.994, 0.997) p<0.001 | 0.996 (0.994, 0.997) p<0.001 | 0.996 (0.994, 0.997) p<0.001 |
| Higher education percentage                          | 0.996 (0.994, 0.997) p<0.001 | 0.995 (0.994, 0.997) p<0.001 | 0.996 (0.994, 0.997) p<0.001 | 0.995 (0.994, 0.997) p<0.001 |
| Parish population density mean                       | 1.000 (1.000, 1.000) p=0.004 | 1.000 (1.000, 1.000) p=0.002 | 1.000 (1.000, 1.000) p=0.003 | 1.000 (1.000, 1.000) p=0.002 |
| Log-likelihood                                       | -44264.76                    | -44255.97                    | -44260.96                    | -44258.43                    |
| Likelihood ratio test (p-value), compared to Model 1 |                              | 17.56 (p=0.0002)             | 7.59 (p=0.0225)              | 12.66 (p=0.0018)             |

**Supplementary Table S6: Adjusted associations between CVD mortality with measures of population density change and green space (female)**

| Cardiovascular Disease Mortality                                | Model 1                                               | Model 2                            | Model 3                            | Model 4                                  |
|-----------------------------------------------------------------|-------------------------------------------------------|------------------------------------|------------------------------------|------------------------------------------|
|                                                                 | Incident Rate Ratio (95% Confidence Interval) p-value |                                    |                                    |                                          |
| Population density decile 2000 to 2008                          |                                                       |                                    |                                    |                                          |
| Stable (reference)                                              |                                                       |                                    |                                    |                                          |
| ≥1 Decile Increase                                              | 0.877 (0.815, 0.944) p<0.001                          | 0.828 (0.759, 0.902) p<0.001       | 0.848 (0.780, 0.923) p<0.001       | 1.445 (0.872, 2.393) p=0.153             |
| ≥1 Decile Decrease                                              | 1.014 (0.905, 1.136) p=0.807                          | 0.941 (0.816, 1.086) p=0.405       | 0.897 (0.773, 1.042) p=0.154       | 2841.109 (0.420, 19,200,000.000) p=0.077 |
| Green space indicators                                          |                                                       |                                    |                                    |                                          |
| Green urban percentage                                          | 0.997 (0.994, 0.999) p=0.016                          | 0.997 (0.994, 0.999) p=0.012       | 0.997 (0.994, 0.999) p=0.015       | 0.997 (0.994, 0.999) p=0.014             |
| Urban park percentage                                           | 1.002 (0.998, 1.006) p=0.400                          | 1.002 (0.998, 1.005) p=0.439       | 1.001 (0.998, 1.005) p=0.451       | 1.001 (0.998, 1.005) p=0.444             |
| Rural green percentage                                          | 0.998 (0.996, 0.999) p=0.013                          | 0.997 (0.996, 0.999) p=0.011       | 0.998 (0.996, 0.999) p=0.011       | 0.998 (0.996, 0.999) p=0.011             |
| Population density decile 2000 to 2008 x Green space indicators |                                                       |                                    |                                    |                                          |
| Stable (reference) x Green urban percentage                     |                                                       |                                    |                                    |                                          |
| ≥1 Decile Increase x Green urban percentage                     |                                                       | 1.013 (1.003, 1.023) p=0.015       |                                    |                                          |
| ≥1 Decile Decrease x Green urban percentage                     |                                                       | 1.160 (0.972, 1.383) p=0.099       |                                    |                                          |
| Stable (reference) x Urban park percentage                      |                                                       |                                    |                                    |                                          |
| ≥1 Decile Increase x Urban park percentage                      |                                                       |                                    | 1.012 (0.997, 1.028) p=0.117       |                                          |
| ≥1 Decile Decrease x Urban park percentage                      |                                                       |                                    | 1.376 (1.066, 1.776) p=0.014       |                                          |
| Stable (reference) x Rural green percentage                     |                                                       |                                    |                                    |                                          |
| ≥1 Decile Increase x Rural green percentage                     |                                                       |                                    |                                    | 0.995 (0.989, 1.000) p=0.049             |
| ≥1 Decile Decrease x Rural green percentage                     |                                                       |                                    |                                    | 0.923 (0.844, 1.009) p=0.078             |
| Year                                                            |                                                       |                                    |                                    |                                          |
| 2000 (reference)                                                |                                                       |                                    |                                    |                                          |
| 2001                                                            | 1.014 (0.992, 1.037) p=0.207                          | 1.015 (0.993, 1.038) p=0.195       | 1.014 (0.992, 1.037) p=0.205       | 1.015 (0.992, 1.037) p=0.199             |
| 2002                                                            | 1.036 (1.013, 1.060) p=0.002                          | 1.037 (1.014, 1.061) p=0.002       | 1.036 (1.013, 1.060) p=0.002       | 1.037 (1.013, 1.061) p=0.002             |
| 2003                                                            | 1.012 (0.988, 1.036) p=0.321                          | 1.013 (0.989, 1.037) p=0.285       | 1.012 (0.989, 1.036) p=0.311       | 1.013 (0.989, 1.037) p=0.297             |
| 2004                                                            | 0.977 (0.953, 1.001) p=0.060                          | 0.978 (0.954, 1.002) p=0.073       | 0.977 (0.954, 1.001) p=0.064       | 0.978 (0.954, 1.002) p=0.069             |
| 2005                                                            | 0.725 (0.707, 0.743) p<0.001                          | 0.725 (0.708, 0.743) p<0.001       | 0.725 (0.707, 0.743) p<0.001       | 0.725 (0.707, 0.743) p<0.001             |
| 2006                                                            | 0.991 (0.964, 1.018) p=0.508                          | 0.993 (0.965, 1.020) p=0.593       | 0.991 (0.964, 1.019) p=0.535       | 0.992 (0.965, 1.020) p=0.566             |
| 2007                                                            | 1.001 (0.971, 1.032) p=0.956                          | 1.003 (0.973, 1.034) p=0.845       | 1.002 (0.971, 1.033) p=0.921       | 1.002 (0.972, 1.034) p=0.880             |
| 2008                                                            | 0.995 (0.962, 1.028) p=0.756                          | 0.997 (0.965, 1.031) p=0.879       | 0.996 (0.963, 1.029) p=0.793       | 0.997 (0.964, 1.030) p=0.839             |
| Age group                                                       |                                                       |                                    |                                    |                                          |
| 18-49 years (reference)                                         |                                                       |                                    |                                    |                                          |
| 50-64 years                                                     | 10.921 (10.140, 11.762) p<0.001                       | 10.921 (10.140, 11.762) p<0.001    | 10.922 (10.141, 11.763) p<0.001    | 10.921 (10.141, 11.763) p<0.001          |
| 65+ years                                                       | 318.646 (297.662, 341.109) p<0.001                    | 318.628 (297.644, 341.091) p<0.001 | 318.673 (297.688, 341.138) p<0.001 | 318.649 (297.664, 341.112) p<0.001       |

|                                                      |                              |                              |                              |                              |
|------------------------------------------------------|------------------------------|------------------------------|------------------------------|------------------------------|
| Mean disposable income                               | 1.000 (1.000, 1.000) p<0.001 |
| Foreign born percentage                              | 0.997 (0.995, 0.999) p=0.005 | 0.997 (0.994, 0.999) p=0.002 | 0.997 (0.994, 0.999) p=0.002 | 0.997 (0.994, 0.999) p=0.002 |
| Higher education percentage                          | 0.995 (0.993, 0.998) p<0.001 |
| Parish population density mean                       | 1.000 (1.000, 1.000) p=0.003 | 1.000 (1.000, 1.000) p=0.002 | 1.000 (1.000, 1.000) p=0.003 | 1.000 (1.000, 1.000) p=0.002 |
| Log-likelihood                                       | -37513.20                    | -37508.73                    | -37508.80                    | -37509.62                    |
| Likelihood ratio test (p-value), compared to Model 1 |                              | 8.95 (p=0.0114)              | 8.81 (p=0.0122)              | 7.16 (p=0.0278)              |

---

**Supplementary Table S7: Adjusted associations between all-cause and CVD mortality with indicators of green space, stratified by population density change, for males and females separately.**

|                                                      | All-Cause Mortality<br>Incident Rate Ratio (95% Confidence Interval) | Cardiovascular Disease Mortality |
|------------------------------------------------------|----------------------------------------------------------------------|----------------------------------|
| <b>Male</b>                                          |                                                                      |                                  |
| Green urban x Population density change 2000 to 2008 |                                                                      |                                  |
| Stable                                               | 0.998 (0.997, 1.000) p=0.033                                         | 0.998 (0.996, 1.000) p=0.040     |
| ≥1 Decile Increase                                   | 1.080 (1.035, 1.127) p<0.001                                         | 1.099 (1.038, 1.164) p=0.001     |
| ≥1 Decile Decrease                                   | 0.788 (0.554, 1.121) p=0.185                                         | 0.884 (0.543, 1.439) p=0.619     |
| Urban park x Population density change 2000 to 2008  |                                                                      |                                  |
| Stable                                               | 1.000 (0.998, 1.002) p=0.975                                         | 1.002 (0.999, 1.004) p=0.228     |
| ≥1 Decile Increase                                   | 1.083 (1.001, 1.171) p=0.048                                         | 1.060 (0.950, 1.181) p=0.298     |
| ≥1 Decile Decrease                                   | 0.857 (0.572, 1.283) p=0.452                                         | 0.692 (0.395, 1.213) p=0.199     |
| Rural green x Population density change 2000 to 2008 |                                                                      |                                  |
| Stable                                               | 0.997 (0.996, 0.998) p<0.001                                         | 0.998 (0.997, 0.999) p=0.003     |
| ≥1 Decile Increase                                   | 1.041 (1.004, 1.079) p=0.030                                         | 1.040 (0.991, 1.092) p=0.109     |
| ≥1 Decile Decrease                                   | 0.886 (0.735, 1.067) p=0.203                                         | 0.842 (0.655, 1.082) p=0.179     |
| <b>Female</b>                                        |                                                                      |                                  |
| Green urban x Population density change 2000 to 2008 |                                                                      |                                  |
| Stable                                               | 0.998 (0.996, 1.000) p=0.022                                         | 0.997 (0.994, 0.999) p=0.007     |
| ≥1 Decile Increase                                   | 1.080 (1.029, 1.133) p=0.002                                         | 1.121 (1.052, 1.194) p<0.001     |
| ≥1 Decile Decrease                                   | 1.769 (1.170, 2.675) p=0.007                                         | 2.460 (1.256, 4.817) p=0.009     |
| Urban park x Population density change 2000 to 2008  |                                                                      |                                  |
| Stable                                               | 1.001 (0.998, 1.004) p=0.672                                         | 1.001 (0.998, 1.005) p=0.455     |
| ≥1 Decile Increase                                   | 1.096 (1.005, 1.194) p=0.038                                         | 1.171 (1.042, 1.317) p=0.008     |
| ≥1 Decile Decrease                                   | 1.882 (1.201, 2.949) p=0.006                                         | 1.561 (0.722, 3.375) p=0.257     |
| Rural green x Population density change 2000 to 2008 |                                                                      |                                  |
| Stable                                               | 0.998 (0.996, 0.999) p=0.002                                         | 0.998 (0.996, 1.000) p=0.015     |
| ≥1 Decile Increase                                   | 1.042 (1.001, 1.086) p=0.047                                         | 1.079 (1.023, 1.138) p=0.005     |
| ≥1 Decile Decrease                                   | 1.209 (0.947, 1.544) p=0.128                                         | 1.300 (0.854, 1.978) p=0.221     |

Note. The stratified results for the entire sample are given in Table 4 in the paper. All models adjusted for year, age group, mean disposable income, percentage foreign born, percentage with higher educational qualification(s), and population density (models containing all people also adjusted for sex)
